# Supplementary material
Source: publisher site journal article supplement (https://www.spandidos-publications.com/1849/downloadSupplementary)

Figure S1. The percentages of Th1, Th2, Th17 and Tregs were determined, and the growth ratio of Th2 and Tregs was also observed corresponding to the change in CD4<sup>+</sup> T cells. Data are presented as mean  $\pm$  standard deviation. \*P<0.05 and \*\*P<0.01 vs. Control group. n=5. Th, T helper cells; Tregs, regulatory T cells.

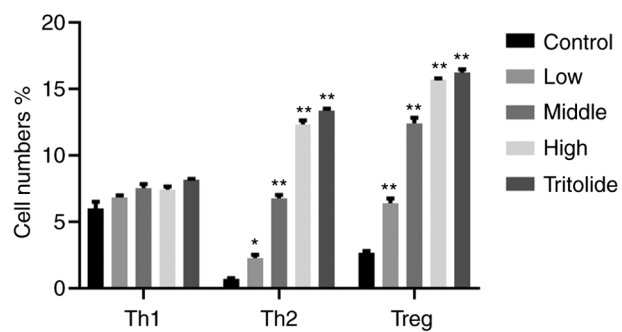

Figure S2. (A) ‘Psoriasis 1’ at different doses and triptolide inhibited the proliferation of T lymphocytes.  $**P<0.01$  vs. Control group. N=5. (B) ‘Psoriasis 1’ affected the proliferation of T lymphocytes following VDR-siRNA transfection.  $*P<0.01$  vs. NC-siRNA group;  $##P<0.01$  vs. VDR-siRNA group. n=5. VDR, vitamin D receptor.

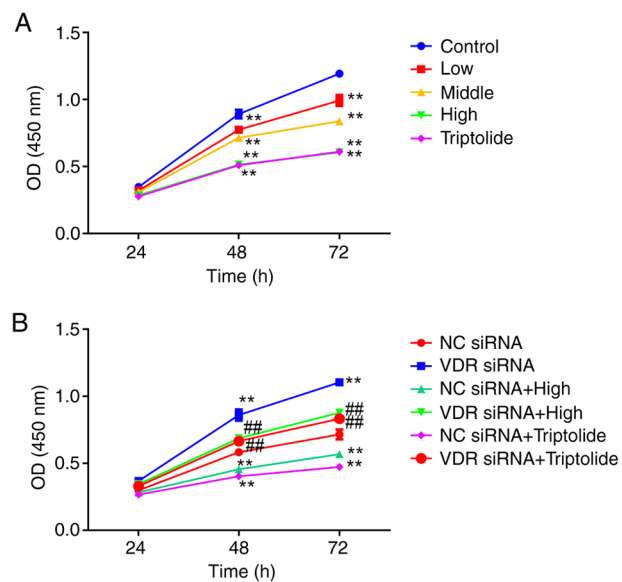

Figure S3. Cytokine expression. TNF- $\alpha$ , IFN- $\gamma$ , IL-2, IL-6, IL-17, and TGF- $\beta$  mRNA levels were detected in groups of control, VD3 (1 nM), 'Psoriasis 1' (high dose), and VD3 + 'Psoriasis 1'. \*P<0.05, \*\*P<0.01. NS, non-significant difference. n=5. TNF, tumor necrosis factor; IFN, interferon; IL, interleukin; TGF, transforming growth factor.

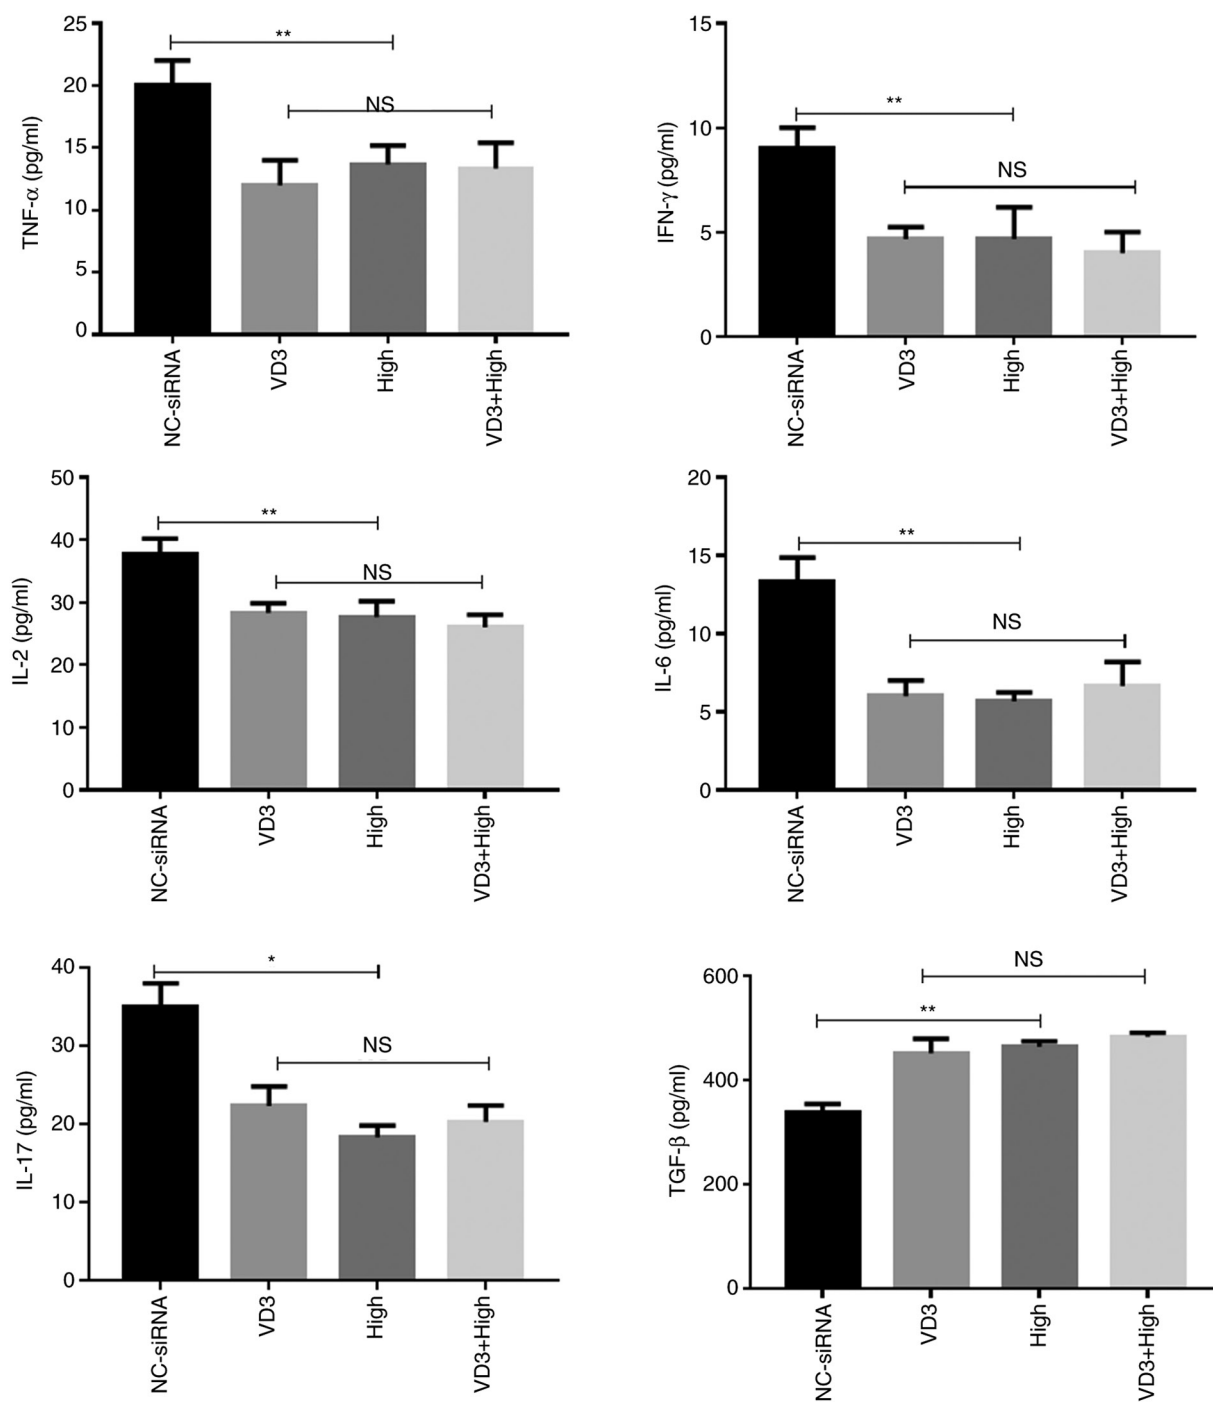

Figure S4. The standard mixture and serum containing 'Psoriasis 1' was subjected to HPLC assay. (A) HPLC results of serum containing 'Psoriasis 1'. (B) HPLC results of standard mixture. (C) Enlarged image of 'Psoriasis 1'-containing serum and standard mixture. HPLC, high-performance liquid chromatography.

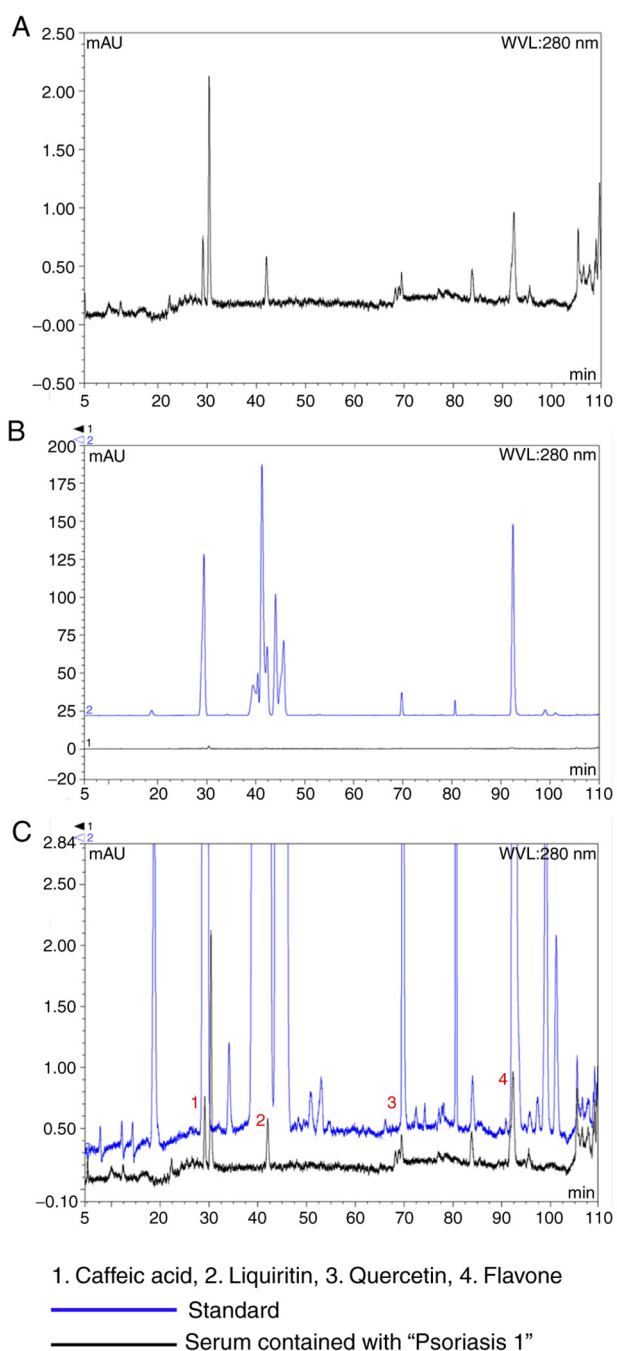

Supplement: Supplementary file 1 [file downloadSupplementary]
